# Supplementary material for: New insight into the application of GFP chromophore inspired derivatives: a F−fluorescent chemodosimeter
Source: Royal Society of Chemistry journal article supplement (doi:10.1039/c4ra09436k), 2014-10-16
Supplement: c4ra09436k1.pdf [file c4ra09436k1.pdf]

*Supporting Information for*

**New Insight into the Application of GFP  
Chromophore Inspired Derivatives: a F<sup>-</sup> Fluorescent  
Chemodosimeter**

**Xiao-Yuan Liu<sup>a</sup>, Lei Shi<sup>a</sup>, Zhifeng Ding<sup>b</sup>, Yi-Tao Long<sup>\*a</sup>**

<sup>a</sup> *Key Laboratory for Advanced Materials & Department of Chemistry, East China*

*University of Science and Technology, Shanghai 200237, China*

*\*E-mail: ytlong@ecust.edu.cn*

<sup>b</sup> *Department of Chemistry, The University of Western Ontario, 1151 Richmond  
Street, London, ON, Canada N6A 5B7.*

## **Table of Contents**

|                                       |            |
|---------------------------------------|------------|
| <b>General Methods</b>                | <b>S3</b>  |
| <b>Synthesis and Characterization</b> | <b>S3</b>  |
| <b>Spectral Analysis</b>              | <b>S5</b>  |
| <b>NMR and MS spectra</b>             | <b>S8</b>  |
| <b>References</b>                     | <b>S11</b> |
| <b>Single Crystal Data</b>            | <b>S12</b> |

## General Methods

N,N-dimethylformamide (DMF) and other chemical reagents for synthesis and analysis are analytical grade, obtained from commercial suppliers, and used without further purification unless specified. DMF was initially dried by distillation over CaH<sub>2</sub> before use. All the anionic compounds such as [Bu<sub>4</sub>N]F, [Bu<sub>4</sub>N]Cl, [Bu<sub>4</sub>N]Br, [Bu<sub>4</sub>N]I, [Bu<sub>4</sub>N]HSO<sub>4</sub>, [Bu<sub>4</sub>N]NO<sub>3</sub>, [Bu<sub>4</sub>N]ClO<sub>4</sub>, [Bu<sub>4</sub>N]AcO and [Bu<sub>4</sub>N]H<sub>2</sub>PO<sub>4</sub> were purchase from Energy Chemical Co.. <sup>1</sup>H NMR and <sup>13</sup>C NMR were acquired in CDCl<sub>3</sub> on BRUKER AVANCE 500 spectrometer using TMS as an internal standard. Mass spectrum was obtained on HP 5989 mass spectrometer.

## Synthesis

### Synthesis of 2,5-bis(tert-butyldimethylsilyloxy)benzaldehyde

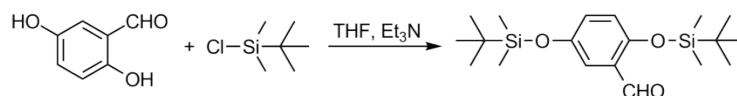

A solution of 2,5-dihydroxybenzaldehyde (0.69 g, 5.0 mmol) in CH<sub>2</sub>Cl<sub>2</sub> (10 mL) was added to a mixture of tert-butyldimethylsilyl chloride (3.00 g, 20.0 mmol) and Et<sub>3</sub>N (2.77 mL, 20.0 mmol) in CH<sub>2</sub>Cl<sub>2</sub> (20 mL) at 0°C. At same temperature the reaction solution was stirred for 2 h, then poured into sat.NH<sub>4</sub>Cl, extracted with CH<sub>2</sub>Cl<sub>2</sub> and dried (MgSO<sub>4</sub>). After concentrated, the residue was purified by silica gel column chromatography to get the 2,5-bis(tert-butyldimethylsilyloxy)benzaldehyde (0.75 g, 41.8%) as a colorless oil.<sup>1</sup> δ<sub>H</sub> (400 MHz, CDCl<sub>3</sub>) 10.31 (1 H, s), 7.16 (1 H, s), 6.89 (1 H, d, J 6.5), 6.68 (1 H, d, J 8.8), 0.93 (9 H, s), 0.89 (9 H, s), 0.16 (6 H, s), 0.10 (6 H, s).

### Synthesis of compound 1

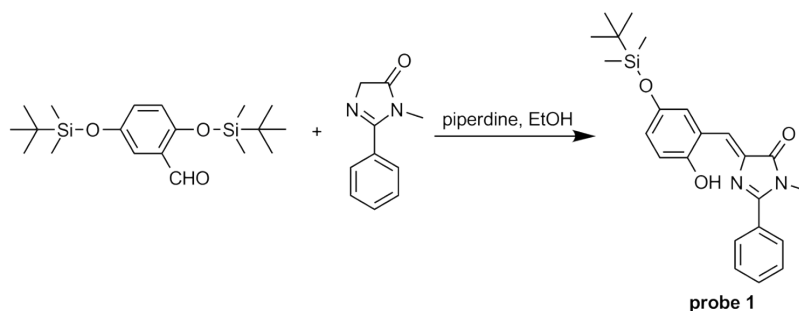

A solution of 2,5-bis(tert-butyldimethylsilyloxy)benzaldehyde (0.36 g, 1.0 mmol), 1-methyl-2-phenyl-1H-imidazol-5(4H)-one (0.17 g, 1.0mmol) and 2-3 drops piperidine in 6 ml ethanol in 25 ml round-bottom flask was stirred at 80°C for 4h. When the reaction is completed, the mixture

was cooled. After evaporation of the solvent, the oily residue was purified by column chromatography to afford chemosensor **1** (0.13 g, 31.8%) as a orange solid.  $\delta_{\text{H}}$  (400 MHz, CDCl<sub>3</sub>) 13.60 (1 H, s), 7.81 (2 H, d, J 8.0), 7.62-7.51 (3 H, m), 7.23 (1 H, s), 6.92 – 6.80 (3 H, m), 3.45 (3 H, s), 0.99 (9 H, s), 0.19 (6 H, s);  $\delta_{\text{C}}$  (101 MHz, CDCl<sub>3</sub>) 169.34, 167.91, 156.15, 152.47, 146.90, 132.39, 131.11, 130.36, 128.10, 127.38, 126.68, 126.16, 124.57, 123.43, 118.9, 28.36, 25.08, 24.66, 23.5, 17.14, -5.52; MS calculated for C<sub>23</sub>H<sub>28</sub>N<sub>2</sub>O<sub>3</sub>Si 408.1869, found 408.1870.

**4-(2-hydroxybenzylidene)-1-methyl-2-phenyl-1H-imidazol-5(4H)-one**

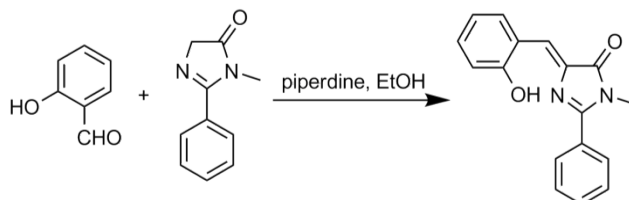

4-(2-hydroxybenzylidene)-1-methyl-2-phenyl-1H-imidazol-5(4H)-one was synthesized using same method as compound **1**. The product was purified and dried to afford 4-(2-hydroxybenzylidene)-1-methyl-2-phenyl-1H-imidazol-5(4H)-one as a yellow solid, yield 81 %;  $\delta_{\text{H}}$  (400 MHz, DMSO) 11.64 (1 H, s), 8.37 (1 H, d, J 7.7), 7.93 (2 H, d, J 7.4), 7.72–7.56 (3 H, m), 7.47 (1 H, s), 7.31 (1 H, t, J 7.6), 6.91 (2 H, t, J 8.6), 3.30 (3 H, s);  $\delta_{\text{C}}$  (101 MHz, DMSO) 170.21, 161.19, 158.38, 136.55, 134.31, 133.36, 132.24, 129.40, 129.06, 124.36, 121.08, 119.99, 117.19, 29.26; Mass spectrum: calculated for C<sub>17</sub>H<sub>14</sub>N<sub>2</sub>O<sub>2</sub> 278.1055, found 278.1058.

## Fluorometric Analysis

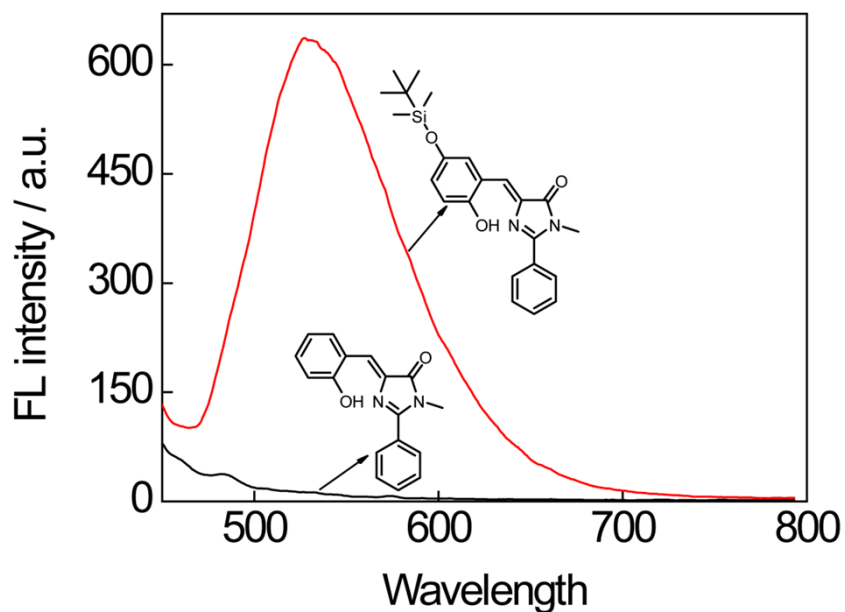

Figure S1. Fluorescence spectra of compound **1** (5  $\mu\text{M}$ ) and 4-(2-hydroxybenzylidene)-1-methyl-2-phenyl-1H-imidazol-5(4H)-one (5  $\mu\text{M}$ ) in DMF at  $\lambda_{\text{ex}} = 420 \text{ nm}$ .

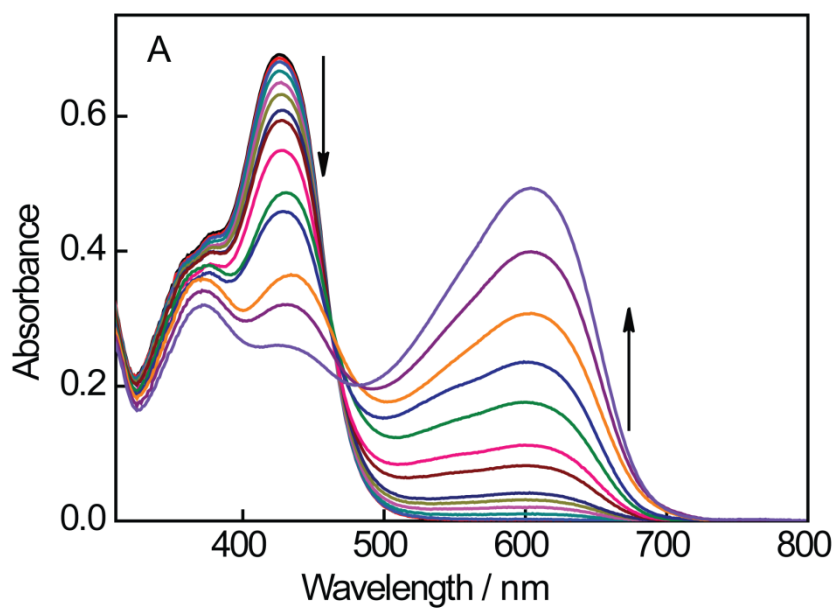

Figure S2. A: UV-vis absorption spectra changes of compound **1** (50  $\mu\text{M}$ ) in the presence of  $\text{F}^-$  concentrations (0, 5, 10, 20, 30, 40, 50, 75, 100, 150, 200, 300, 600  $\mu\text{M}$ ) in DMF.

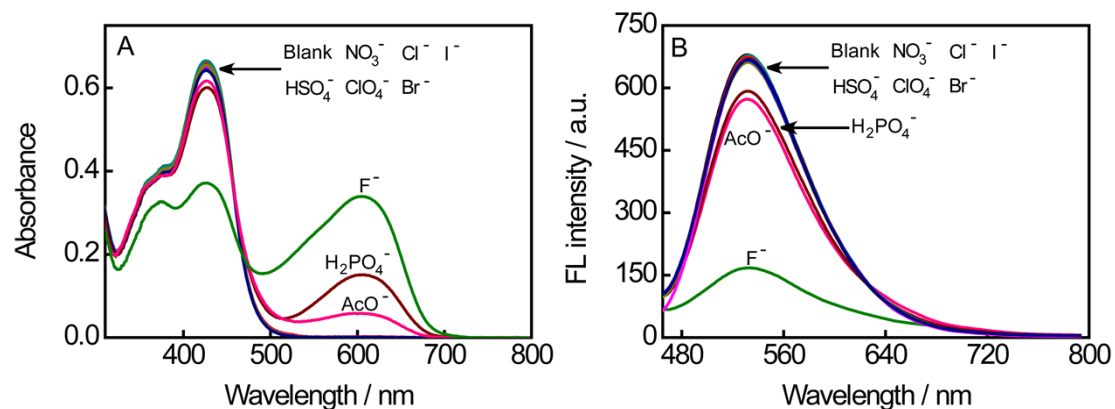

Figure. S3 A: UV-vis absorption spectral changes of compound **1** (50  $\mu$ M) after treatment with 8.0 equivalents of Cl<sup>-</sup>, Br<sup>-</sup>, I<sup>-</sup>, NO<sub>3</sub><sup>-</sup>, ClO<sub>4</sub><sup>-</sup>, HSO<sub>4</sub><sup>-</sup>, H<sub>2</sub>PO<sub>4</sub><sup>-</sup>, AcO<sup>-</sup> and F<sup>-</sup> as tetrabutyl-ammonium salt in DMF; B: Fluorescence changes of compound **1** (5  $\mu$ M) after treatment with 64.0 equivalents of Cl<sup>-</sup>, Br<sup>-</sup>, I<sup>-</sup>, NO<sub>3</sub><sup>-</sup>, ClO<sub>4</sub><sup>-</sup>, HSO<sub>4</sub><sup>-</sup>, H<sub>2</sub>PO<sub>4</sub><sup>-</sup>, AcO<sup>-</sup> and F<sup>-</sup> as tetrabutyl-ammonium salt in DMF at  $\lambda_{ex}$  = 420nm.

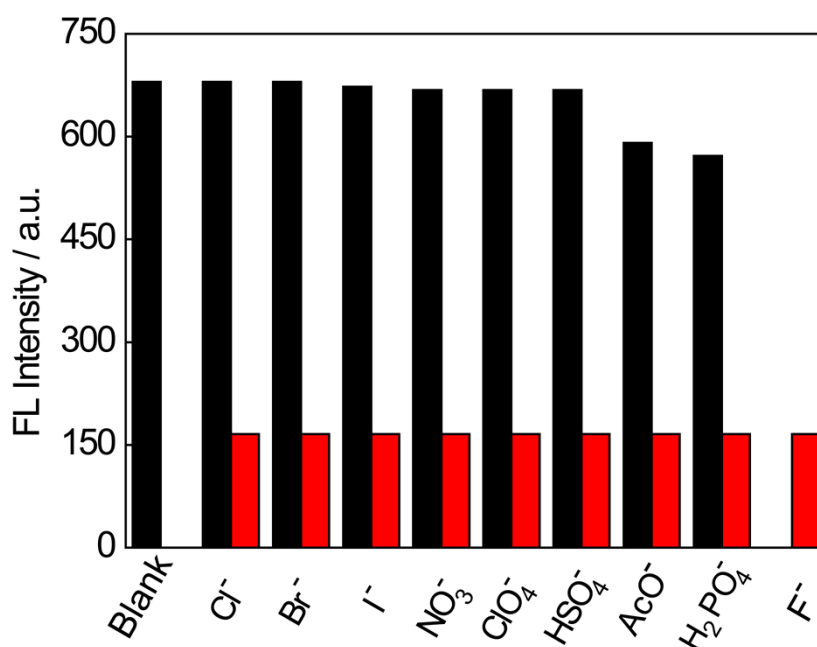

Figure. S4 Fluorescence responses of competitive experiment of compound **1** (5  $\mu$ M) with common anions in DMF at  $\lambda_{ex}$  = 420nm. Black bars represent the fluorescence

responses of blank and a single anion including 64.0 equivalents of  $\text{Cl}^-$ ,  $\text{Br}^-$ ,  $\text{I}^-$ ,  $\text{NO}_3^-$ ,  $\text{ClO}_4^-$ ,  $\text{HSO}_4^-$ ,  $\text{H}_2\text{PO}_4^-$ ,  $\text{AcO}^-$  and  $\text{F}^-$  as tetrabutyl-ammonium salt; red bars represent the subsequent addition of  $\text{F}^-$  to the mixture solution. All data is the fluorescent intensity at 532 nm.

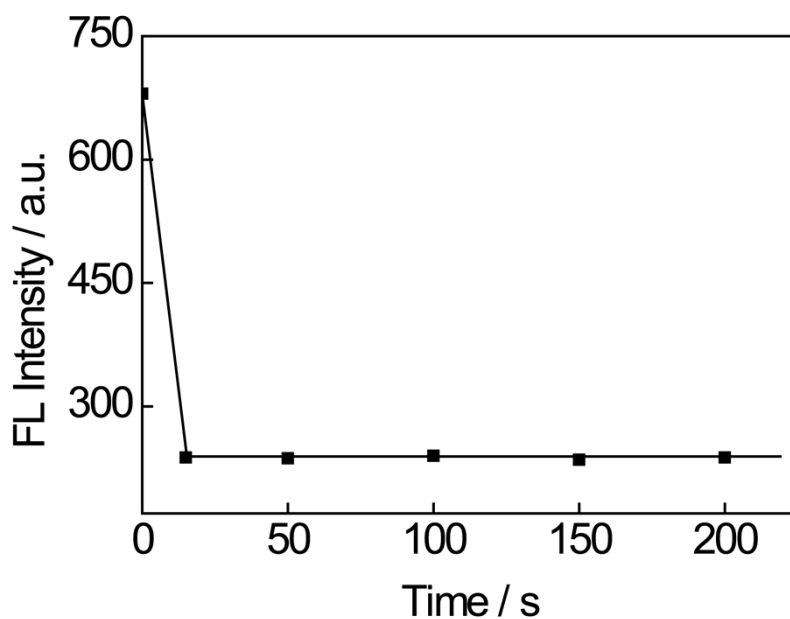

Figure. S5 Effect of reaction time on the fluorescence intensity of compound **1** ( $5 \mu\text{M}$ ) with 36.0 equivalents of  $\text{F}^-$  in DMF at  $\lambda_{\text{ex}} = 420\text{nm}$ . All data is the fluorescent intensity at 532 nm.

## NMR and MS spectra

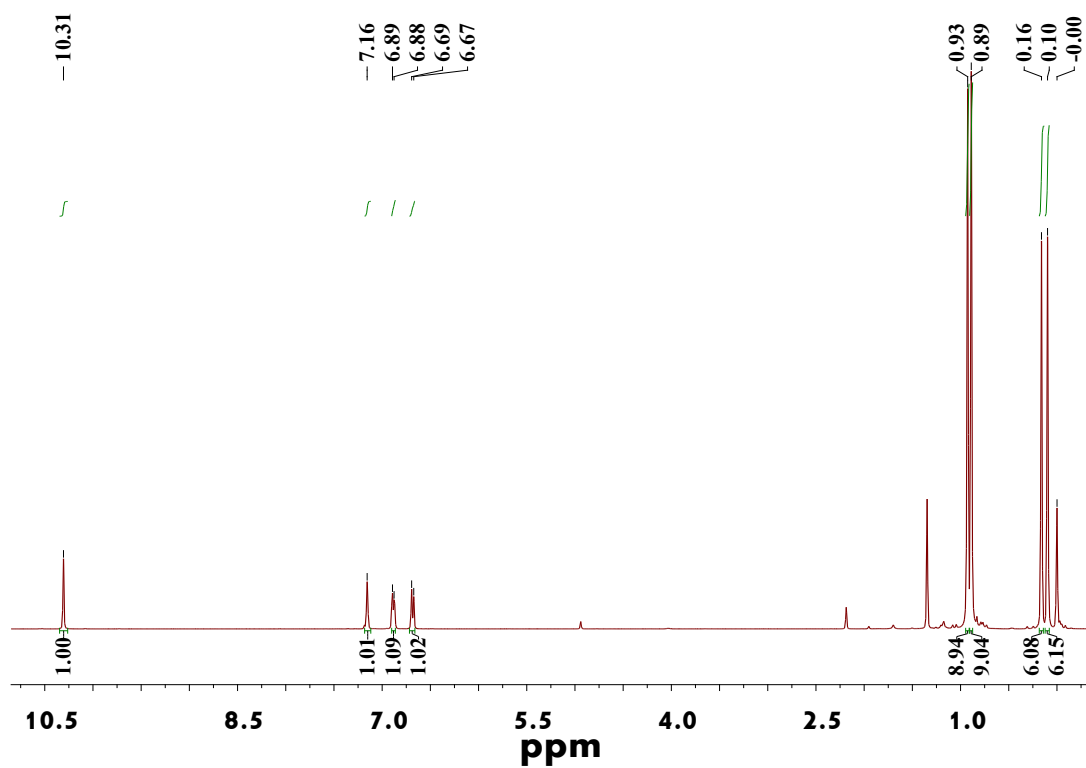

Figure S5.  $^1\text{H}$  NMR spectrum of 2,5-bis(tert-butyl dimethylsilyloxy)benzaldehyde in  $\text{CDCl}_3$



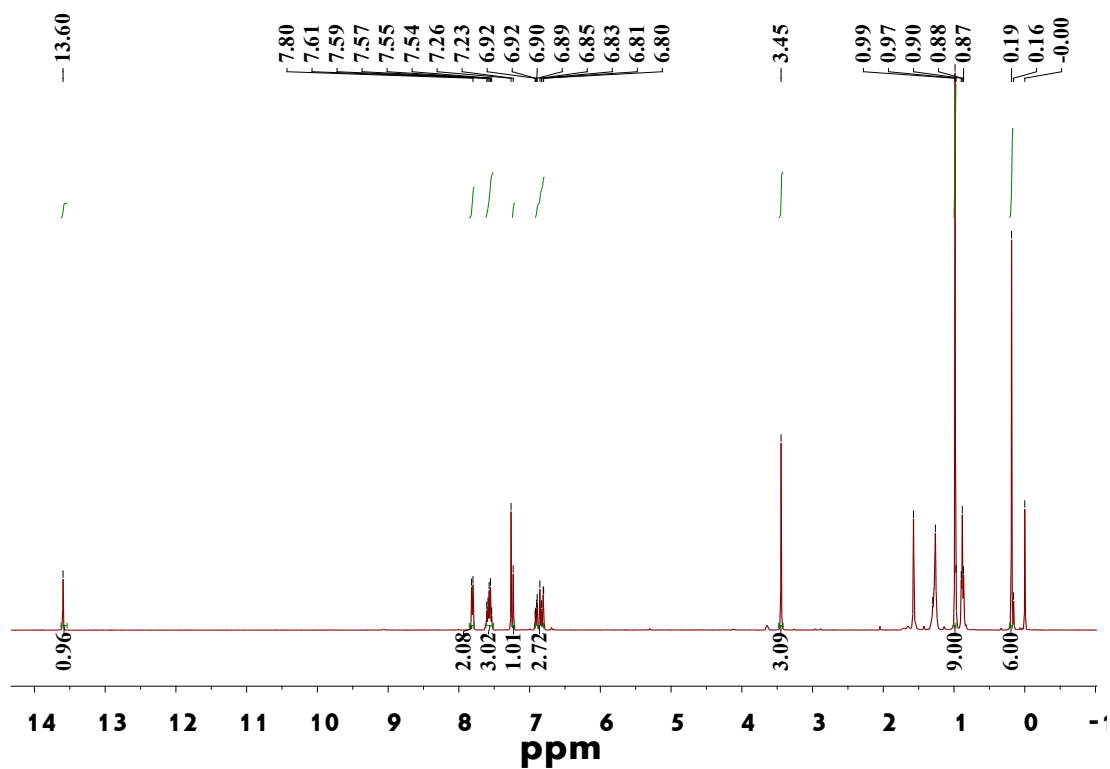

Figure S6.  $^1\text{H}$  NMR spectrum of compound **1** in  $\text{CDCl}_3$

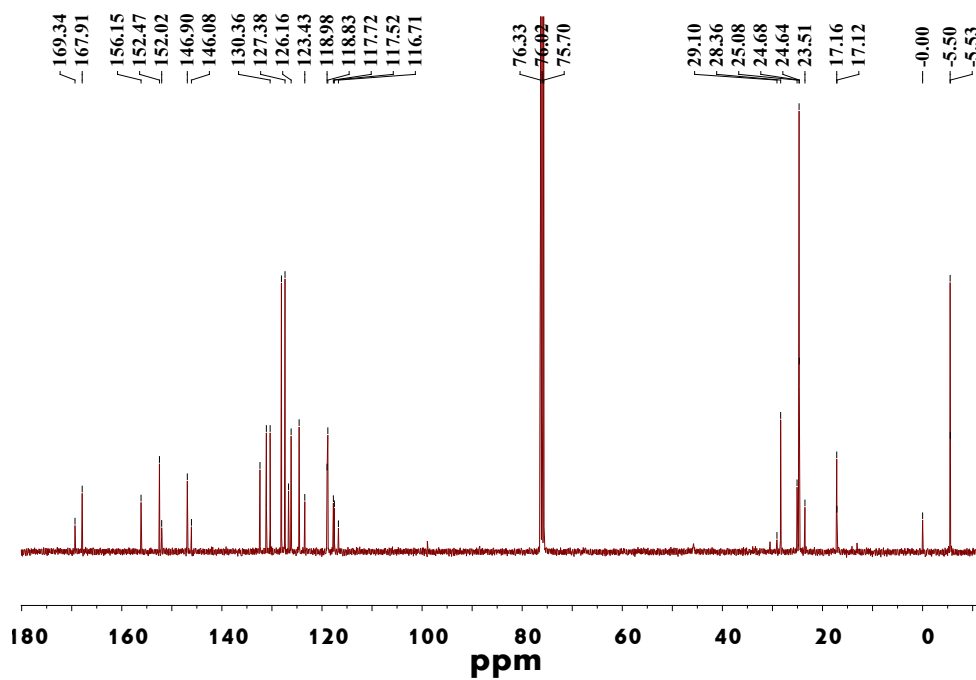

Figure S7.  $^{13}\text{C}$  NMR spectrum of compound **1** in  $\text{CDCl}_3$

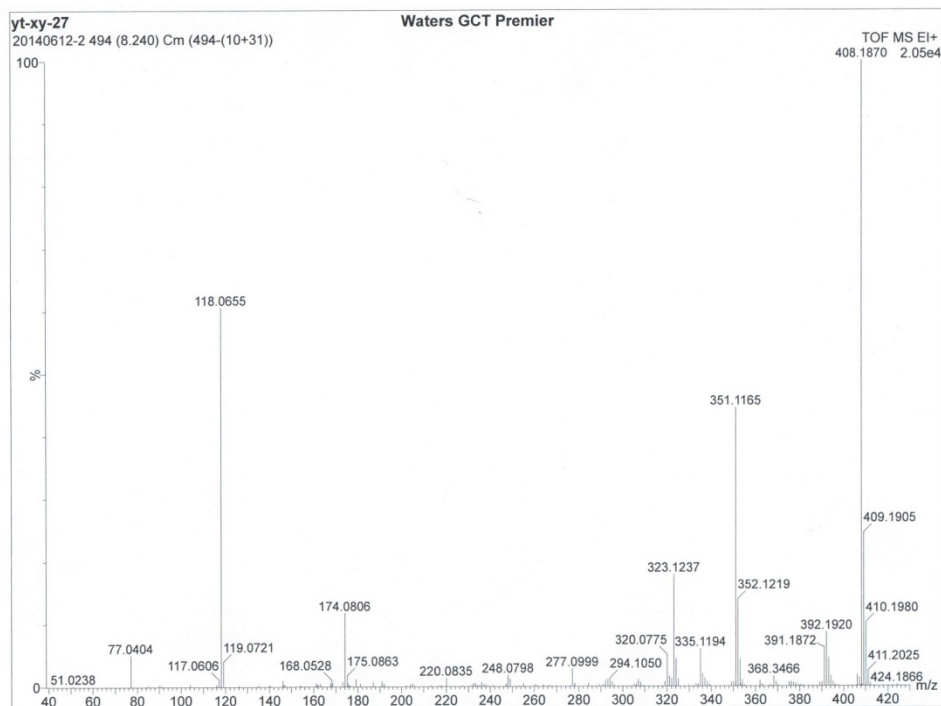

Figure S8. MS spectrum of compound **1** in  $\text{CDCl}_3$

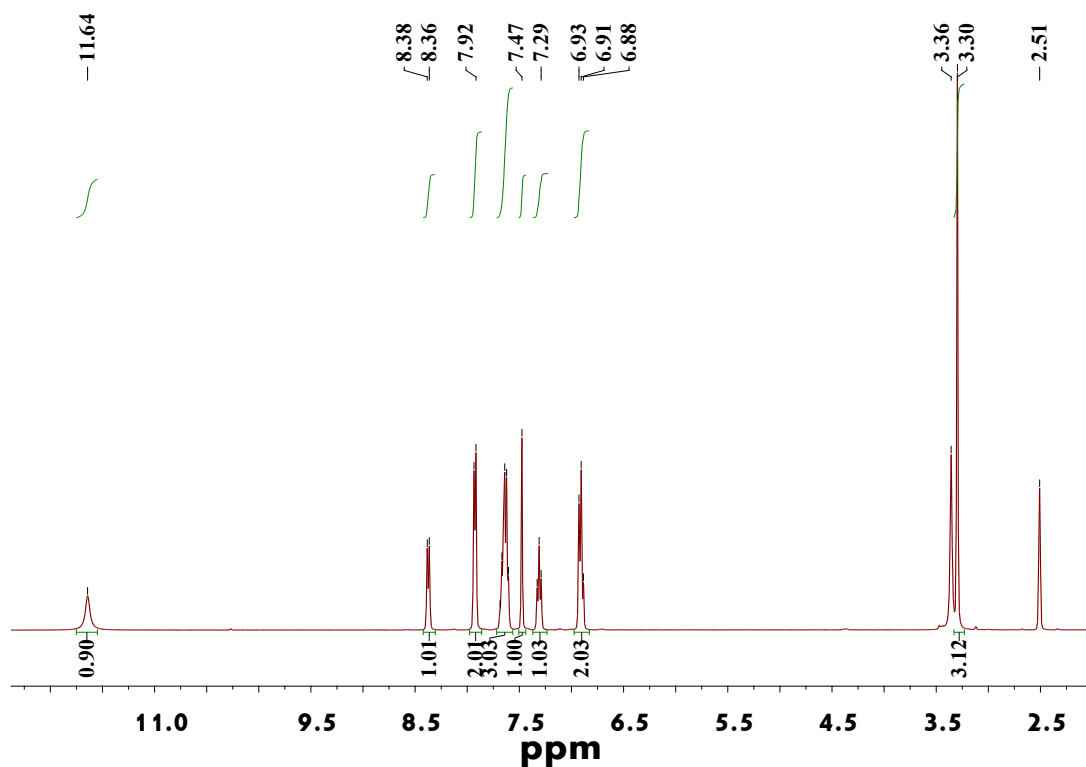

Figure S9.  $^1\text{H}$  NMR spectrum of 4-(2-hydroxybenzylidene)-1-methyl-2-phenyl-1H-imidazol-5(4H)-one in  $\text{CDCl}_3$

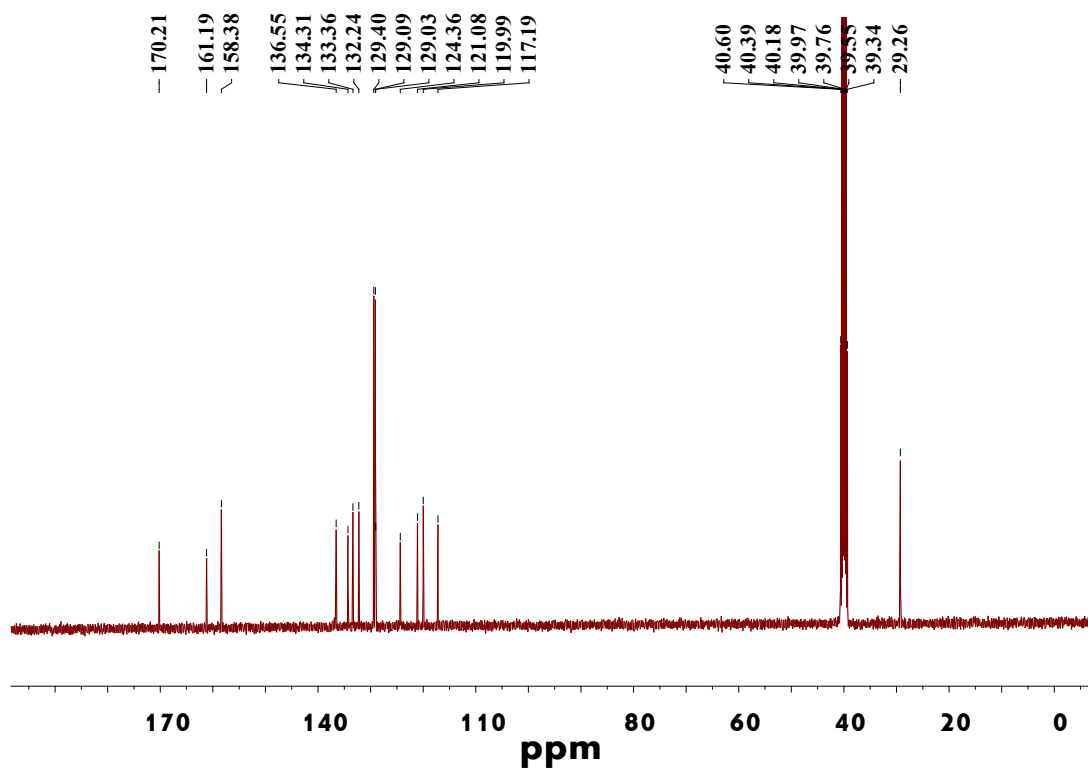

Figure S10.  $^{13}\text{C}$  NMR spectrum of 4-(2-hydroxybenzylidene)-1-methyl-2-phenyl-1H-imidazol-5(4H)-one in  $\text{CDCl}_3$

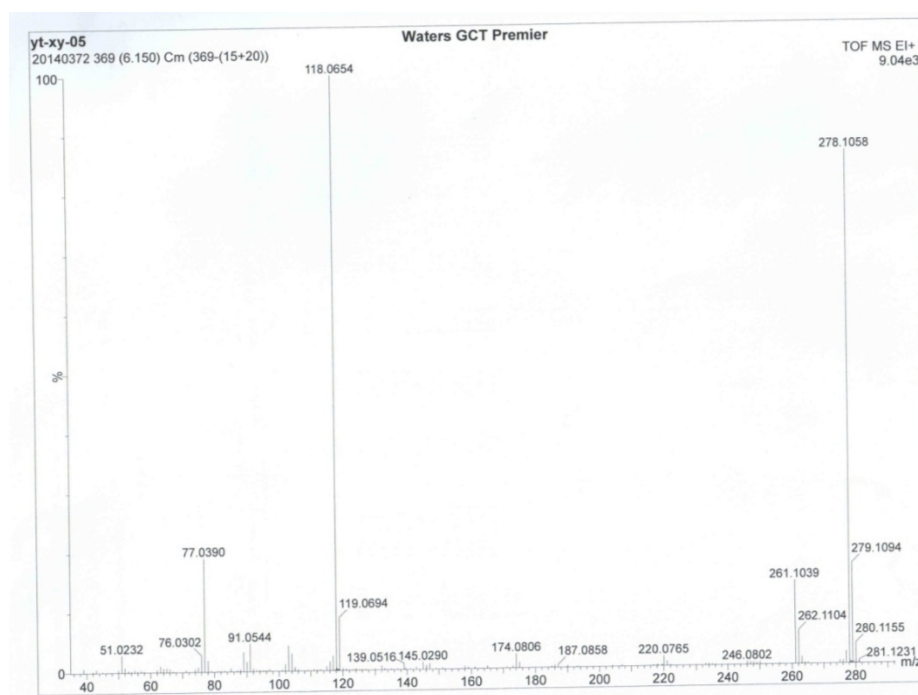

Figure S11. MS spectrum of 4-(2-hydroxybenzylidene)-1-methyl-2-phenyl-1H-imidazol-5(4H)-one in  $\text{CDCl}_3$

## References

1. A. Kojima, T. Takemoto, M. Sodeoka and M. Shibasaki, *J. Org. Chem.*, 1996, **61**, 4876-4877.
2. Y. Li, L. Shi, L. X. Qin, L. L. Qu, C. Jing, M. Lan, T. D. James and Y. T. Long, *Chem. Commun.*, 2011, **47**, 4361-4363.

## Single Crystal Data

Table 1. Crystal data and structure refinement for compound 1.

|                                 |                                                                  |                  |
|---------------------------------|------------------------------------------------------------------|------------------|
| Identification code             | cd214277                                                         |                  |
| Empirical formula               | C <sub>23</sub> H <sub>28</sub> N <sub>2</sub> O <sub>3</sub> Si |                  |
| Formula weight                  | 408.56                                                           |                  |
| Temperature                     | 293(2) K                                                         |                  |
| Wavelength                      | 0.71073 Å                                                        |                  |
| Crystal system                  | Monoclinic                                                       |                  |
| Space group                     | C 2/c                                                            |                  |
| Unit cell dimensions            | a = 32.516(6) Å                                                  | α = 90°.         |
|                                 | b = 10.7386(19) Å                                                | β = 113.348(4)°. |
|                                 | c = 13.927(3) Å                                                  | γ = 90°.         |
| Volume                          | 4464.7(14) Å <sup>3</sup>                                        |                  |
| Z                               | 8                                                                |                  |
| Density (calculated)            | 1.216 Mg/m <sup>3</sup>                                          |                  |
| Absorption coefficient          | 0.131 mm <sup>-1</sup>                                           |                  |
| F(000)                          | 1744                                                             |                  |
| Crystal size                    | 0.211 x 0.175 x 0.087 mm <sup>3</sup>                            |                  |
| Theta range for data collection | 2.015 to 25.499°.                                                |                  |
| Index ranges                    | -36 ≤ h ≤ 39, -9 ≤ k ≤ 13, -16 ≤ l ≤ 16                          |                  |

|                                   |                                             |
|-----------------------------------|---------------------------------------------|
| Reflections collected             | 12754                                       |
| Independent reflections           | 4151 [R(int) = 0.0598]                      |
| Completeness to theta = 25.242°   | 99.9 %                                      |
| Absorption correction             | Semi-empirical from equivalents             |
| Max. and min. transmission        | 0.7457 and 0.6221                           |
| Refinement method                 | Full-matrix least-squares on F <sup>2</sup> |
| Data / restraints / parameters    | 4151 / 79 / 340                             |
| Goodness-of-fit on F <sup>2</sup> | 1.044                                       |
| Final R indices [I>2sigma(I)]     | R1 = 0.0800, wR2 = 0.2120                   |
| R indices (all data)              | R1 = 0.1349, wR2 = 0.2523                   |
| Largest diff. peak and hole       | 0.689 and -0.383 e.Å <sup>-3</sup>          |

Table 2. Atomic coordinates (x 10<sup>4</sup>) and equivalent isotropic displacement parameters (Å<sup>2</sup>x 10<sup>3</sup>) for compound 1. U(eq) is defined as one third of the trace of the orthogonalized U<sup>ij</sup> tensor.

|       | x        | y       | z       | U(eq)  |
|-------|----------|---------|---------|--------|
| N(1)  | -607(1)  | 5065(3) | 3280(2) | 67(1)  |
| N(2)  | 126(1)   | 5426(3) | 3792(2) | 66(1)  |
| O(1)  | -615(1)  | 2915(3) | 3411(2) | 92(1)  |
| O(2)  | 995(1)   | 5484(3) | 4380(2) | 90(1)  |
| O(3)  | 1701(1)  | 729(3)  | 4905(3) | 118(1) |
| C(1)  | -271(1)  | 5931(3) | 3469(2) | 63(1)  |
| C(2)  | -414(1)  | 3888(4) | 3485(3) | 71(1)  |
| C(3)  | 67(1)    | 4144(3) | 3805(3) | 66(1)  |
| C(4)  | 378(1)   | 3242(3) | 4038(3) | 73(1)  |
| C(5)  | 856(1)   | 3237(4) | 4337(3) | 73(1)  |
| C(6)  | 1061(2)  | 2056(4) | 4488(3) | 84(1)  |
| C(7)  | 1509(2)  | 1905(5) | 4781(4) | 95(1)  |
| C(8)  | 1775(2)  | 2942(5) | 4907(4) | 102(1) |
| C(9)  | 1589(2)  | 4112(5) | 4775(4) | 95(1)  |
| C(10) | 1133(1)  | 4282(4) | 4497(3) | 77(1)  |
| C(11) | -342(1)  | 7275(3) | 3323(3) | 64(1)  |
| C(12) | -15(1)   | 8073(3) | 3953(3) | 76(1)  |
| C(13) | -65(2)   | 9339(4) | 3823(4) | 86(1)  |
| C(14) | -442(2)  | 9832(4) | 3062(4) | 89(1)  |
| C(15) | -770(2)  | 9052(4) | 2418(3) | 87(1)  |
| C(16) | -723(1)  | 7775(4) | 2540(3) | 76(1)  |
| C(17) | -1081(1) | 5241(4) | 3044(3) | 82(1)  |

|        |          |           |          |         |
|--------|----------|-----------|----------|---------|
| Si(1)  | 1742(1)  | -438(3)   | 5657(2)  | 115(1)  |
| C(18)  | 1900(5)  | -1942(12) | 5087(12) | 123(4)  |
| C(19)  | 1180(3)  | -942(15)  | 5548(11) | 106(4)  |
| C(20)  | 2104(4)  | -67(12)   | 7003(10) | 150(4)  |
| C(21)  | 2087(5)  | -1147(14) | 7707(9)  | 181(5)  |
| C(23)  | 2598(4)  | 94(16)    | 6986(11) | 160(5)  |
| C(22)  | 1865(8)  | 1040(20)  | 7310(20) | 171(11) |
| Si(1') | 2002(1)  | 205(4)    | 6223(4)  | 98(1)   |
| C(18') | 1956(9)  | 1220(20)  | 7200(20) | 86(5)   |
| C(19') | 2581(6)  | -60(20)   | 6280(16) | 136(6)  |
| C(20') | 1737(5)  | -1335(14) | 6127(11) | 121(4)  |
| C(21') | 1948(8)  | -2076(19) | 7149(15) | 184(8)  |
| C(22') | 1992(11) | -1900(40) | 5500(20) | 226(18) |
| C(23') | 1238(8)  | -1120(30) | 5970(20) | 186(15) |

---

Table 3. Bond lengths [ $\text{\AA}$ ] and angles [ $^\circ$ ] for compound 1.

---

|             |           |
|-------------|-----------|
| N(1)-C(1)   | 1.380(4)  |
| N(1)-C(2)   | 1.391(4)  |
| N(1)-C(17)  | 1.454(5)  |
| N(2)-C(1)   | 1.303(4)  |
| N(2)-C(3)   | 1.391(4)  |
| O(1)-C(2)   | 1.216(4)  |
| O(2)-C(10)  | 1.355(5)  |
| O(2)-H(2)   | 0.837(19) |
| O(3)-C(7)   | 1.389(5)  |
| O(3)-Si(1)  | 1.605(4)  |
| O(3)-Si(1') | 1.795(6)  |
| C(1)-C(11)  | 1.463(5)  |
| C(2)-C(3)   | 1.471(5)  |
| C(3)-C(4)   | 1.343(5)  |
| C(4)-C(5)   | 1.443(6)  |
| C(4)-H(4)   | 0.9300    |
| C(5)-C(10)  | 1.400(5)  |
| C(5)-C(6)   | 1.409(5)  |
| C(6)-C(7)   | 1.359(6)  |
| C(6)-H(6)   | 0.9300    |
| C(7)-C(8)   | 1.377(7)  |

|              |           |
|--------------|-----------|
| C(8)-C(9)    | 1.375(6)  |
| C(8)-H(8)    | 0.9300    |
| C(9)-C(10)   | 1.388(6)  |
| C(9)-H(9)    | 0.9300    |
| C(11)-C(12)  | 1.378(5)  |
| C(11)-C(16)  | 1.393(5)  |
| C(12)-C(13)  | 1.373(5)  |
| C(12)-H(12)  | 0.9300    |
| C(13)-C(14)  | 1.369(6)  |
| C(13)-H(13)  | 0.9300    |
| C(14)-C(15)  | 1.374(6)  |
| C(14)-H(14)  | 0.9300    |
| C(15)-C(16)  | 1.382(5)  |
| C(15)-H(15)  | 0.9300    |
| C(16)-H(16)  | 0.9300    |
| C(17)-H(17A) | 0.9600    |
| C(17)-H(17B) | 0.9600    |
| C(17)-H(17C) | 0.9600    |
| Si(1)-C(20)  | 1.819(13) |
| Si(1)-C(19)  | 1.854(12) |
| Si(1)-C(18)  | 1.957(10) |
| C(18)-H(18A) | 0.9600    |
| C(18)-H(18B) | 0.9600    |
| C(18)-H(18C) | 0.9600    |
| C(19)-H(19A) | 0.9600    |
| C(19)-H(19B) | 0.9600    |
| C(19)-H(19C) | 0.9600    |
| C(20)-C(21)  | 1.534(13) |
| C(20)-C(22)  | 1.569(17) |
| C(20)-C(23)  | 1.627(13) |
| C(21)-H(21A) | 0.9600    |
| C(21)-H(21B) | 0.9600    |
| C(21)-H(21C) | 0.9600    |
| C(23)-H(23A) | 0.9600    |
| C(23)-H(23B) | 0.9600    |
| C(23)-H(23C) | 0.9600    |
| C(22)-H(22A) | 0.9600    |
| C(22)-H(22B) | 0.9600    |

|                  |           |
|------------------|-----------|
| C(22)-H(22C)     | 0.9600    |
| Si(1')-C(18')    | 1.79(2)   |
| Si(1')-C(20')    | 1.844(15) |
| Si(1')-C(19')    | 1.874(17) |
| C(18')-H(18D)    | 0.9600    |
| C(18')-H(18E)    | 0.9600    |
| C(18')-H(18F)    | 0.9600    |
| C(19')-H(19D)    | 0.9600    |
| C(19')-H(19E)    | 0.9600    |
| C(19')-H(19F)    | 0.9600    |
| C(20')-C(21')    | 1.535(15) |
| C(20')-C(22')    | 1.545(18) |
| C(20')-C(23')    | 1.566(18) |
| C(21')-H(21D)    | 0.9600    |
| C(21')-H(21E)    | 0.9600    |
| C(21')-H(21F)    | 0.9600    |
| C(22')-H(22D)    | 0.9600    |
| C(22')-H(22E)    | 0.9600    |
| C(22')-H(22F)    | 0.9600    |
| C(23')-H(23D)    | 0.9600    |
| C(23')-H(23E)    | 0.9600    |
| C(23')-H(23F)    | 0.9600    |
|                  |           |
| C(1)-N(1)-C(2)   | 108.3(3)  |
| C(1)-N(1)-C(17)  | 130.1(3)  |
| C(2)-N(1)-C(17)  | 121.2(3)  |
| C(1)-N(2)-C(3)   | 107.1(3)  |
| C(10)-O(2)-H(2)  | 112(3)    |
| C(7)-O(3)-Si(1)  | 135.2(3)  |
| C(7)-O(3)-Si(1') | 116.7(3)  |
| N(2)-C(1)-N(1)   | 112.7(3)  |
| N(2)-C(1)-C(11)  | 122.7(3)  |
| N(1)-C(1)-C(11)  | 124.6(3)  |
| O(1)-C(2)-N(1)   | 125.4(4)  |
| O(1)-C(2)-C(3)   | 131.2(4)  |
| N(1)-C(2)-C(3)   | 103.4(3)  |
| C(4)-C(3)-N(2)   | 128.5(4)  |
| C(4)-C(3)-C(2)   | 123.0(3)  |



|                   |          |
|-------------------|----------|
| N(2)-C(3)-C(2)    | 108.5(3) |
| C(3)-C(4)-C(5)    | 134.0(4) |
| C(3)-C(4)-H(4)    | 113.0    |
| C(5)-C(4)-H(4)    | 113.0    |
| C(10)-C(5)-C(6)   | 117.5(4) |
| C(10)-C(5)-C(4)   | 126.5(3) |
| C(6)-C(5)-C(4)    | 116.0(4) |
| C(7)-C(6)-C(5)    | 122.7(4) |
| C(7)-C(6)-H(6)    | 118.7    |
| C(5)-C(6)-H(6)    | 118.7    |
| C(6)-C(7)-C(8)    | 119.1(4) |
| C(6)-C(7)-O(3)    | 121.4(5) |
| C(8)-C(7)-O(3)    | 119.5(5) |
| C(9)-C(8)-C(7)    | 120.0(5) |
| C(9)-C(8)-H(8)    | 120.0    |
| C(7)-C(8)-H(8)    | 120.0    |
| C(8)-C(9)-C(10)   | 121.5(4) |
| C(8)-C(9)-H(9)    | 119.2    |
| C(10)-C(9)-H(9)   | 119.2    |
| O(2)-C(10)-C(9)   | 115.1(4) |
| O(2)-C(10)-C(5)   | 125.7(4) |
| C(9)-C(10)-C(5)   | 119.1(4) |
| C(12)-C(11)-C(16) | 118.8(3) |
| C(12)-C(11)-C(1)  | 119.0(3) |
| C(16)-C(11)-C(1)  | 122.2(3) |
| C(13)-C(12)-C(11) | 120.7(4) |
| C(13)-C(12)-H(12) | 119.6    |
| C(11)-C(12)-H(12) | 119.6    |
| C(14)-C(13)-C(12) | 120.5(4) |
| C(14)-C(13)-H(13) | 119.7    |
| C(12)-C(13)-H(13) | 119.7    |
| C(13)-C(14)-C(15) | 119.6(4) |
| C(13)-C(14)-H(14) | 120.2    |
| C(15)-C(14)-H(14) | 120.2    |
| C(14)-C(15)-C(16) | 120.4(4) |
| C(14)-C(15)-H(15) | 119.8    |
| C(16)-C(15)-H(15) | 119.8    |
| C(15)-C(16)-C(11) | 120.0(4) |

|                     |           |
|---------------------|-----------|
| C(15)-C(16)-H(16)   | 120.0     |
| C(11)-C(16)-H(16)   | 120.0     |
| N(1)-C(17)-H(17A)   | 109.5     |
| N(1)-C(17)-H(17B)   | 109.5     |
| H(17A)-C(17)-H(17B) | 109.5     |
| N(1)-C(17)-H(17C)   | 109.5     |
| H(17A)-C(17)-H(17C) | 109.5     |
| H(17B)-C(17)-H(17C) | 109.5     |
| O(3)-Si(1)-C(20)    | 110.7(5)  |
| O(3)-Si(1)-C(19)    | 110.5(5)  |
| C(20)-Si(1)-C(19)   | 111.3(6)  |
| O(3)-Si(1)-C(18)    | 110.3(6)  |
| C(20)-Si(1)-C(18)   | 115.6(6)  |
| C(19)-Si(1)-C(18)   | 97.8(7)   |
| Si(1)-C(18)-H(18A)  | 109.5     |
| Si(1)-C(18)-H(18B)  | 109.5     |
| H(18A)-C(18)-H(18B) | 109.5     |
| Si(1)-C(18)-H(18C)  | 109.5     |
| H(18A)-C(18)-H(18C) | 109.5     |
| H(18B)-C(18)-H(18C) | 109.5     |
| Si(1)-C(19)-H(19A)  | 109.5     |
| Si(1)-C(19)-H(19B)  | 109.5     |
| H(19A)-C(19)-H(19B) | 109.5     |
| Si(1)-C(19)-H(19C)  | 109.5     |
| H(19A)-C(19)-H(19C) | 109.5     |
| H(19B)-C(19)-H(19C) | 109.5     |
| C(21)-C(20)-C(22)   | 104.6(15) |
| C(21)-C(20)-C(23)   | 112.1(11) |
| C(22)-C(20)-C(23)   | 121.5(14) |
| C(21)-C(20)-Si(1)   | 108.7(9)  |
| C(22)-C(20)-Si(1)   | 105.0(12) |
| C(23)-C(20)-Si(1)   | 104.4(9)  |
| C(20)-C(21)-H(21A)  | 109.5     |
| C(20)-C(21)-H(21B)  | 109.5     |
| H(21A)-C(21)-H(21B) | 109.5     |
| C(20)-C(21)-H(21C)  | 109.5     |
| H(21A)-C(21)-H(21C) | 109.5     |
| H(21B)-C(21)-H(21C) | 109.5     |

|                      |           |
|----------------------|-----------|
| C(20)-C(23)-H(23A)   | 109.5     |
| C(20)-C(23)-H(23B)   | 109.5     |
| H(23A)-C(23)-H(23B)  | 109.5     |
| C(20)-C(23)-H(23C)   | 109.5     |
| H(23A)-C(23)-H(23C)  | 109.5     |
| H(23B)-C(23)-H(23C)  | 109.5     |
| C(20)-C(22)-H(22A)   | 109.5     |
| C(20)-C(22)-H(22B)   | 109.5     |
| H(22A)-C(22)-H(22B)  | 109.5     |
| C(20)-C(22)-H(22C)   | 109.5     |
| H(22A)-C(22)-H(22C)  | 109.5     |
| H(22B)-C(22)-H(22C)  | 109.5     |
| C(18')-Si(1')-O(3)   | 114.2(9)  |
| C(18')-Si(1')-C(20') | 114.9(11) |
| O(3)-Si(1')-C(20')   | 99.0(5)   |
| C(18')-Si(1')-C(19') | 116.4(11) |
| O(3)-Si(1')-C(19')   | 102.9(7)  |
| C(20')-Si(1')-C(19') | 107.4(9)  |
| Si(1')-C(18')-H(18D) | 109.5     |
| Si(1')-C(18')-H(18E) | 109.5     |
| H(18D)-C(18')-H(18E) | 109.5     |
| Si(1')-C(18')-H(18F) | 109.5     |
| H(18D)-C(18')-H(18F) | 109.5     |
| H(18E)-C(18')-H(18F) | 109.5     |
| Si(1')-C(19')-H(19D) | 109.5     |
| Si(1')-C(19')-H(19E) | 109.5     |
| H(19D)-C(19')-H(19E) | 109.5     |
| Si(1')-C(19')-H(19F) | 109.5     |
| H(19D)-C(19')-H(19F) | 109.5     |
| H(19E)-C(19')-H(19F) | 109.5     |
| C(21')-C(20')-C(22') | 100.3(19) |
| C(21')-C(20')-C(23') | 105.4(17) |
| C(22')-C(20')-C(23') | 137(2)    |
| C(21')-C(20')-Si(1') | 112.0(11) |
| C(22')-C(20')-Si(1') | 93.1(18)  |
| C(23')-C(20')-Si(1') | 107.8(16) |
| C(20')-C(21')-H(21D) | 109.4     |
| C(20')-C(21')-H(21E) | 109.6     |

|                      |       |
|----------------------|-------|
| H(21D)-C(21')-H(21E) | 109.5 |
| C(20')-C(21')-H(21F) | 109.5 |
| H(21D)-C(21')-H(21F) | 109.5 |
| H(21E)-C(21')-H(21F) | 109.5 |
| C(20')-C(22')-H(22D) | 109.5 |
| C(20')-C(22')-H(22E) | 109.5 |
| H(22D)-C(22')-H(22E) | 109.5 |
| C(20')-C(22')-H(22F) | 109.5 |
| H(22D)-C(22')-H(22F) | 109.5 |
| H(22E)-C(22')-H(22F) | 109.5 |
| C(20')-C(23')-H(23D) | 109.5 |
| C(20')-C(23')-H(23E) | 109.5 |
| H(23D)-C(23')-H(23E) | 109.5 |
| C(20')-C(23')-H(23F) | 109.5 |
| H(23D)-C(23')-H(23F) | 109.5 |
| H(23E)-C(23')-H(23F) | 109.5 |

---

Symmetry transformations used to generate equivalent atoms:

Table 4. Anisotropic displacement parameters ( $\text{\AA}^2 \times 10^3$ ) for compound 1. The anisotropic displacement factor exponent takes the form:  $-2\pi^2 [ h^2 a^* U^{11} + \dots + 2 h k a^* b^* U^{12} ]$

|       | $U^{11}$ | $U^{22}$ | $U^{33}$ | $U^{23}$ | $U^{13}$ | $U^{12}$ |
|-------|----------|----------|----------|----------|----------|----------|
| N(1)  | 70(2)    | 63(2)    | 65(2)    | 4(1)     | 23(1)    | 4(2)     |
| N(2)  | 77(2)    | 63(2)    | 58(2)    | 1(1)     | 26(1)    | 5(2)     |
| O(1)  | 97(2)    | 65(2)    | 107(2)   | 5(2)     | 32(2)    | -8(2)    |
| O(2)  | 82(2)    | 73(2)    | 112(2)   | 4(2)     | 37(2)    | 4(2)     |
| O(3)  | 124(3)   | 101(2)   | 142(3)   | 42(2)    | 68(2)    | 49(2)    |
| C(1)  | 74(2)    | 62(2)    | 51(2)    | -1(2)    | 22(2)    | 0(2)     |
| C(2)  | 86(3)    | 63(2)    | 62(2)    | 1(2)     | 27(2)    | 1(2)     |
| C(3)  | 80(2)    | 58(2)    | 57(2)    | 2(2)     | 23(2)    | 5(2)     |
| C(4)  | 87(3)    | 62(2)    | 65(2)    | 3(2)     | 24(2)    | 5(2)     |
| C(5)  | 84(3)    | 73(3)    | 60(2)    | 8(2)     | 28(2)    | 12(2)    |
| C(6)  | 93(3)    | 76(3)    | 84(3)    | 14(2)    | 35(2)    | 18(2)    |
| C(7)  | 102(4)   | 92(3)    | 95(3)    | 25(3)    | 43(3)    | 30(3)    |
| C(8)  | 86(3)    | 111(4)   | 110(4)   | 17(3)    | 41(3)    | 21(3)    |
| C(9)  | 86(3)    | 94(3)    | 104(3)   | 15(3)    | 39(2)    | 9(3)     |
| C(10) | 87(3)    | 74(3)    | 71(2)    | 8(2)     | 32(2)    | 12(2)    |

|        |         |         |         |        |        |         |
|--------|---------|---------|---------|--------|--------|---------|
| C(11)  | 74(2)   | 58(2)   | 62(2)   | -3(2)  | 31(2)  | 1(2)    |
| C(12)  | 85(3)   | 71(3)   | 72(2)   | -1(2)  | 31(2)  | -5(2)   |
| C(13)  | 97(3)   | 68(3)   | 98(3)   | -8(2)  | 42(3)  | -12(2)  |
| C(14)  | 105(3)  | 59(2)   | 120(4)  | -3(2)  | 62(3)  | 0(2)    |
| C(15)  | 90(3)   | 73(3)   | 100(3)  | 11(2)  | 41(2)  | 18(2)   |
| C(16)  | 81(3)   | 65(2)   | 79(3)   | -1(2)  | 29(2)  | 4(2)    |
| C(17)  | 79(3)   | 85(3)   | 85(3)   | 1(2)   | 35(2)  | -2(2)   |
| Si(1)  | 112(2)  | 91(2)   | 120(2)  | 28(2)  | 21(2)  | 8(1)    |
| C(18)  | 123(8)  | 96(7)   | 132(8)  | -41(6) | 31(6)  | 40(6)   |
| C(19)  | 67(5)   | 130(8)  | 108(7)  | 13(7)  | 22(4)  | -21(5)  |
| C(20)  | 158(8)  | 161(8)  | 131(7)  | 31(7)  | 57(6)  | 19(6)   |
| C(21)  | 209(12) | 195(12) | 120(8)  | 52(8)  | 45(8)  | 16(10)  |
| C(23)  | 71(6)   | 206(11) | 186(12) | -1(11) | 33(8)  | 7(6)    |
| C(22)  | 179(18) | 240(20) | 126(12) | 1(13)  | 91(11) | 55(16)  |
| Si(1') | 83(2)   | 93(2)   | 114(3)  | 12(2)  | 33(2)  | 0(2)    |
| C(18') | 94(9)   | 91(9)   | 72(9)   | -24(7) | 33(8)  | -3(7)   |
| C(19') | 86(9)   | 167(13) | 172(14) | -4(12) | 68(10) | -16(8)  |
| C(20') | 100(7)  | 118(8)  | 140(8)  | 37(7)  | 42(6)  | -1(6)   |
| C(21') | 214(15) | 141(12) | 160(14) | 73(11) | 36(11) | -34(11) |
| C(22') | 190(20) | 250(20) | 250(30) | 15(16) | 91(18) | 60(16)  |
| C(23') | 146(18) | 200(20) | 230(20) | 24(17) | 91(16) | -24(13) |

Table 5. Hydrogen coordinates ( $\times 10^4$ ) and isotropic displacement parameters ( $\text{\AA}^2 \times 10^{-3}$ ) for compound 1.

|        | x     | y     | z    | U(eq) |
|--------|-------|-------|------|-------|
| H(4)   | 258   | 2448  | 3997 | 88    |
| H(6)   | 882   | 1352  | 4383 | 101   |
| H(8)   | 2081  | 2851  | 5082 | 122   |
| H(9)   | 1773  | 4805  | 4875 | 114   |
| H(12)  | 243   | 7750  | 4472 | 91    |
| H(13)  | 159   | 9866  | 4255 | 104   |
| H(14)  | -475  | 10691 | 2983 | 107   |
| H(15)  | -1025 | 9384  | 1896 | 104   |
| H(16)  | -946  | 7251  | 2100 | 91    |
| H(17A) | -1121 | 5996  | 3364 | 124   |

|        |        |          |          |        |
|--------|--------|----------|----------|--------|
| H(17B) | -1190  | 4549     | 3311     | 124    |
| H(17C) | -1244  | 5293     | 2300     | 124    |
| H(18A) | 1702   | -2033    | 4365     | 184    |
| H(18B) | 1873   | -2655    | 5473     | 184    |
| H(18C) | 2203   | -1876    | 5142     | 184    |
| H(19A) | 981    | -992     | 4823     | 159    |
| H(19B) | 1065   | -351     | 5896     | 159    |
| H(19C) | 1202   | -1746    | 5867     | 159    |
| H(21A) | 2187   | -861     | 8417     | 271    |
| H(21B) | 2278   | -1808    | 7667     | 271    |
| H(21C) | 1785   | -1447    | 7479     | 271    |
| H(23A) | 2804   | 389      | 7655     | 240    |
| H(23B) | 2584   | 684      | 6455     | 240    |
| H(23C) | 2699   | -695     | 6838     | 240    |
| H(22A) | 1565   | 801      | 7196     | 257    |
| H(22B) | 1856   | 1753     | 6885     | 257    |
| H(22C) | 2027   | 1245     | 8033     | 257    |
| H(18D) | 2045   | 2043     | 7103     | 129    |
| H(18E) | 2147   | 919      | 7881     | 129    |
| H(18F) | 1652   | 1227     | 7138     | 129    |
| H(19D) | 2770   | 623      | 6635     | 205    |
| H(19E) | 2570   | -124     | 5583     | 205    |
| H(19F) | 2699   | -820     | 6652     | 205    |
| H(21D) | 1846   | -1743    | 7656     | 276    |
| H(21E) | 2268   | -2015    | 7411     | 276    |
| H(21F) | 1860   | -2934    | 7020     | 276    |
| H(22D) | 2176   | -2575    | 5890     | 338    |
| H(22E) | 2176   | -1273    | 5381     | 338    |
| H(22F) | 1780   | -2205    | 4842     | 338    |
| H(23D) | 1216   | -1106    | 6635     | 278    |
| H(23E) | 1055   | -1780    | 5549     | 278    |
| H(23F) | 1136   | -337     | 5619     | 278    |
| H(2)   | 719(7) | 5540(40) | 4220(30) | 96(16) |

Table 6. Torsion angles [°] for compound 1.

|                      |           |
|----------------------|-----------|
| C(3)-N(2)-C(1)-N(1)  | 1.7(4)    |
| C(3)-N(2)-C(1)-C(11) | -178.0(3) |

|                       |           |
|-----------------------|-----------|
| C(2)-N(1)-C(1)-N(2)   | -0.8(4)   |
| C(17)-N(1)-C(1)-N(2)  | 171.3(3)  |
| C(2)-N(1)-C(1)-C(11)  | 178.8(3)  |
| C(17)-N(1)-C(1)-C(11) | -9.1(5)   |
| C(1)-N(1)-C(2)-O(1)   | 179.0(4)  |
| C(17)-N(1)-C(2)-O(1)  | 6.0(6)    |
| C(1)-N(1)-C(2)-C(3)   | -0.4(4)   |
| C(17)-N(1)-C(2)-C(3)  | -173.3(3) |
| C(1)-N(2)-C(3)-C(4)   | 176.8(4)  |
| C(1)-N(2)-C(3)-C(2)   | -1.9(4)   |
| O(1)-C(2)-C(3)-C(4)   | 3.3(6)    |
| N(1)-C(2)-C(3)-C(4)   | -177.4(3) |
| O(1)-C(2)-C(3)-N(2)   | -177.9(4) |
| N(1)-C(2)-C(3)-N(2)   | 1.4(4)    |
| N(2)-C(3)-C(4)-C(5)   | -0.4(7)   |
| C(2)-C(3)-C(4)-C(5)   | 178.0(4)  |
| C(3)-C(4)-C(5)-C(10)  | 2.3(7)    |
| C(3)-C(4)-C(5)-C(6)   | -178.3(4) |
| C(10)-C(5)-C(6)-C(7)  | 0.2(6)    |
| C(4)-C(5)-C(6)-C(7)   | -179.3(4) |
| C(5)-C(6)-C(7)-C(8)   | -2.0(7)   |
| C(5)-C(6)-C(7)-O(3)   | -178.8(4) |
| Si(1)-O(3)-C(7)-C(6)  | -62.5(7)  |
| Si(1')-O(3)-C(7)-C(6) | -105.0(5) |
| Si(1)-O(3)-C(7)-C(8)  | 120.7(5)  |
| Si(1')-O(3)-C(7)-C(8) | 78.2(5)   |
| C(6)-C(7)-C(8)-C(9)   | 2.4(7)    |
| O(3)-C(7)-C(8)-C(9)   | 179.3(4)  |
| C(7)-C(8)-C(9)-C(10)  | -1.1(7)   |
| C(8)-C(9)-C(10)-O(2)  | -179.1(4) |
| C(8)-C(9)-C(10)-C(5)  | -0.7(7)   |
| C(6)-C(5)-C(10)-O(2)  | 179.3(4)  |
| C(4)-C(5)-C(10)-O(2)  | -1.3(6)   |
| C(6)-C(5)-C(10)-C(9)  | 1.2(6)    |
| C(4)-C(5)-C(10)-C(9)  | -179.4(4) |
| N(2)-C(1)-C(11)-C(12) | -30.9(5)  |
| N(1)-C(1)-C(11)-C(12) | 149.5(3)  |
| N(2)-C(1)-C(11)-C(16) | 146.4(4)  |

|                              |            |
|------------------------------|------------|
| N(1)-C(1)-C(11)-C(16)        | -33.2(5)   |
| C(16)-C(11)-C(12)-C(13)      | 0.9(6)     |
| C(1)-C(11)-C(12)-C(13)       | 178.4(4)   |
| C(11)-C(12)-C(13)-C(14)      | 0.0(6)     |
| C(12)-C(13)-C(14)-C(15)      | -0.7(7)    |
| C(13)-C(14)-C(15)-C(16)      | 0.6(7)     |
| C(14)-C(15)-C(16)-C(11)      | 0.3(6)     |
| C(12)-C(11)-C(16)-C(15)      | -1.0(6)    |
| C(1)-C(11)-C(16)-C(15)       | -178.4(4)  |
| C(7)-O(3)-Si(1)-C(20)        | -68.0(7)   |
| Si(1')-O(3)-Si(1)-C(20)      | 8.0(5)     |
| C(7)-O(3)-Si(1)-C(19)        | 55.8(8)    |
| Si(1')-O(3)-Si(1)-C(19)      | 131.7(6)   |
| C(7)-O(3)-Si(1)-C(18)        | 162.7(7)   |
| Si(1')-O(3)-Si(1)-C(18)      | -121.3(6)  |
| O(3)-Si(1)-C(20)-C(21)       | 173.2(8)   |
| C(19)-Si(1)-C(20)-C(21)      | 49.9(11)   |
| C(18)-Si(1)-C(20)-C(21)      | -60.5(11)  |
| O(3)-Si(1)-C(20)-C(22)       | 61.7(12)   |
| C(19)-Si(1)-C(20)-C(22)      | -61.6(13)  |
| C(18)-Si(1)-C(20)-C(22)      | -171.9(13) |
| O(3)-Si(1)-C(20)-C(23)       | -67.1(9)   |
| C(19)-Si(1)-C(20)-C(23)      | 169.6(9)   |
| C(18)-Si(1)-C(20)-C(23)      | 59.3(11)   |
| C(7)-O(3)-Si(1')-C(18')      | 7.0(11)    |
| Si(1)-O(3)-Si(1')-C(18')     | -123.1(10) |
| C(7)-O(3)-Si(1')-C(20')      | 129.6(6)   |
| Si(1)-O(3)-Si(1')-C(20')     | -0.5(5)    |
| C(7)-O(3)-Si(1')-C(19')      | -120.1(8)  |
| Si(1)-O(3)-Si(1')-C(19')     | 109.8(8)   |
| C(18'')-Si(1')-C(20')-C(21') | -61.1(18)  |
| O(3)-Si(1')-C(20')-C(21')    | 176.8(14)  |
| C(19'')-Si(1')-C(20')-C(21') | 70.1(16)   |
| C(18'')-Si(1')-C(20')-C(22') | -163.5(16) |
| O(3)-Si(1')-C(20')-C(22')    | 74.4(14)   |
| C(19'')-Si(1')-C(20')-C(22') | -32.3(16)  |
| C(18'')-Si(1')-C(20')-C(23') | 54.3(18)   |
| O(3)-Si(1')-C(20')-C(23')    | -67.8(15)  |



C(19')-Si(1')-C(20')-C(23')

-174.5(15)

---

Symmetry transformations used to generate equivalent atoms:

Table 7. Hydrogen bonds for compound 1 [ $\text{\AA}$  and  $^\circ$ ].

---

| D-H...A          | d(D-H)    | d(H...A) | d(D...A) | $\angle(\text{DHA})$ |
|------------------|-----------|----------|----------|----------------------|
| O(2)-H(2)...N(2) | 0.837(19) | 1.78(2)  | 2.614(4) | 171(4)               |
| O(2)-H(2)...N(2) | 0.837(19) | 1.78(2)  | 2.614(4) | 171(4)               |
| O(2)-H(2)...N(2) | 0.837(19) | 1.78(2)  | 2.614(4) | 171(4)               |
| O(2)-H(2)...N(2) | 0.837(19) | 1.78(2)  | 2.614(4) | 171(4)               |
| O(2)-H(2)...N(2) | 0.837(19) | 1.78(2)  | 2.614(4) | 171(4)               |
| O(2)-H(2)...N(2) | 0.837(19) | 1.78(2)  | 2.614(4) | 171(4)               |
| O(2)-H(2)...N(2) | 0.837(19) | 1.78(2)  | 2.614(4) | 171(4)               |
| O(2)-H(2)...N(2) | 0.837(19) | 1.78(2)  | 2.614(4) | 171(4)               |
| O(2)-H(2)...N(2) | 0.837(19) | 1.78(2)  | 2.614(4) | 171(4)               |
| O(2)-H(2)...N(2) | 0.837(19) | 1.78(2)  | 2.614(4) | 171(4)               |
| O(2)-H(2)...N(2) | 0.837(19) | 1.78(2)  | 2.614(4) | 171(4)               |
| O(2)-H(2)...N(2) | 0.837(19) | 1.78(2)  | 2.614(4) | 171(4)               |

---

Symmetry transformations used to generate equivalent atoms:
